# Supplementary material for: Microfluidic magnetic self-assembly at liquid–liquid interfaces
Source: Royal Society of Chemistry journal article supplement (doi:10.1039/c5sm03104d), 2016-01-01
Supplement: c5sm03104d2.pdf [file c5sm03104d2.pdf]

**Supplementary Information:**

**Microfluidic magnetic self-assembly at liquid-liquid interfaces**

Steven G. Jones,<sup>a</sup> Niki Abbasi,<sup>a</sup> Byeong-Ui Moon,<sup>a</sup> and Scott S. H. Tsai<sup>ab\*</sup>

<sup>a</sup> Department of Mechanical and Industrial Engineering, Ryerson University, Toronto, Canada

<sup>b</sup> Keenan Research Centre, Li Ka Shing Knowledge Institute, St. Michael's Hospital, Toronto, Canada

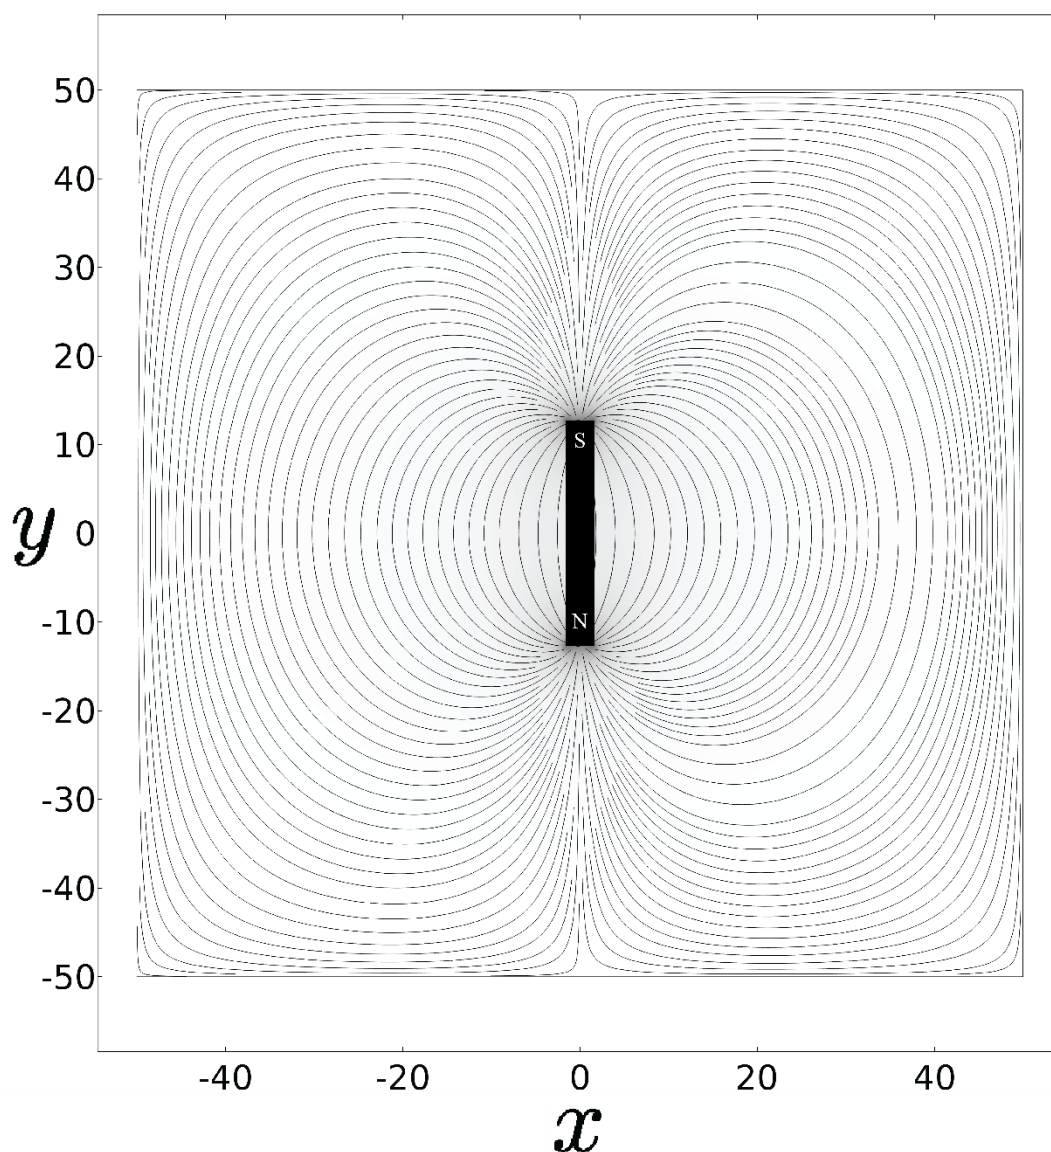

Figure S1. A plot of the magnetic field,  $H$ . The  $x$  and  $y$  axes are in units of mm. The origin on this plot is situated at the center of the magnet. The apex of the liquid-liquid interface in our experiments is in the range of 0.8 – 1.4 mm from the north or south poles of the permanent magnet. This plot is generated using COMSOL Multiphysics.

### **Supplementary Information Movies Captions:**

Supplementary Information Movie 1:

Video shows the self-assembly of paramagnetic microparticles. Here, we have used ATPS 4, so the liquid-liquid interfacial tension  $\gamma = 0.082$  mN/m between the DEX phase (top) and PEG phase (bottom). The magnet distance  $l_m = 1,400$   $\mu\text{m}$ . Scale bar is 50  $\mu\text{m}$ .
